# Supplementary material for: Mechanistic study on integrated water-fertilizer management to alleviate Na + toxicity and enhance salt tolerance and yield of pakchoi under salt stress
Source: PeerJ journal article supplement (doi:10.7717/peerj.20431), 2025-12-18
Supplement: Raw_Data_revised.zip [file Raw Data-1.xlsx]

## Sheet: Tab. 3 The Na+, K+, Ca2+content
																						Tab. 3 The Na+, K+, Ca2+contents of single plant and their ratio under different irrigation and fertilization modes
																						Treatments	K+ (%)	Ca2+ (%)	Na+ (%)	K+/Na+	Na+/Ca2+
																						FI	1.32±0.14 g	0.41±0.03 g	9.22±0.29 a	0.14±0.01 g	22.64±2.13 a
																						FT	2.36±0.28 de	0.67±0.02 e	7.08±0.43 b	0.33±0.05 e	10.53±0.59 cd
																						FP	1.78±0.14 f	0.65±0.02 e	4.9±0.15 d	0.36±0.03 e	7.6±0.22 e
																						MI	2.13±0.28 e	0.38±0.02 g	6.62±0.42 bc	0.32±0.04 e	17.28±1.70 b
																						MT	4.06±0.43 a	0.83±0.02 c	5.07±0.35 d	0.81±0.09 b	6.15±0.47 f
																						MP	3.28±0.43 bc	0.91±0.02 b	3.5±0.56 e	0.96±0.16 b	3.84±0.61 g
																						CI	1.39±0.15 g	0.56±0.02 f	6.06±0.41 c	0.23±0.04 f	10.82±0.90 cd
			K+%								Na+%											CT	2.83±0.29 cd	0.71±0.02 d	6.67±0.56 bc	0.42±0.06 d	9.43±0.84 d
Treatment	Rep1	Rep2	Rep3	Rep4	Rep5	Mean	SD		Treatment	Rep1	Rep2	Rep3	Rep4	Rep5	Mean	SD						CP	3.73±0.86 ab	0.83±0.02 c	6.39±0.41 bc	0.59±0.12 c	7.72±0.70 e
FI	1.3324	1.1952	1.1685	1.4387	1.4701	1.32098	0.137201		FI	8.8124	9.0142	9.3169	9.5187	9.4178	9.216	0.294172						CK	3.89±0.42 ab	0.98±0.03 a	1.12±0.28 f	3.61±0.86 a	1.15±0.28 h
FT	2.5405	2.0464	2.4615	2.067	2.6596	2.355	0.281386		FT	6.4853	6.7822	7.2274	7.5242	7.3758	7.07898	0.432691
FP	1.727	1.8807	1.6564	1.6585	1.9724	1.779	0.141423		FP	4.6943	4.7972	4.9514	5.0542	5.0028	4.89998	0.14989
MI	2.275	1.6395	2.2789	2.161	2.2806	2.127	0.277211		MI	6.0388	6.3269	6.7591	7.0472	6.9031	6.61502	0.419991							Na+/Ga2+
MT	3.8369	4.4103	3.4538	4.5119	4.0622	4.05502	0.431294		MT	4.5868	4.8264	5.1858	5.4254	5.3056	5.066	0.349274				Treatment	Rep1	Rep2	Rep3	Rep4	Rep5	Mean	SD
MP	3.1069	3.044	3.4304	2.8751	3.9635	3.28398	0.429918		MP	2.7228	3.1099	3.6906	4.0777	3.8841	3.49702	0.564308				FI	20.4369	20.818	22.8692	25.7054	23.3634	22.6386	2.12988	22.64±2.13 a
CI	1.5708	1.3818	1.4447	1.1609	1.3868	1.389	0.148526		CI	5.4934	5.7777	6.2041	6.4884	6.3463	6.06198	0.414418				FT	9.95136	10.0077	11.0393	11.2621	10.4207	10.5362	0.594703	10.53±0.59 cd
CT	2.9629	2.7579	2.9247	3.1172	2.3623	2.825	0.288501		CT	5.8967	6.2808	6.8571	7.2412	7.0492	6.665	0.560003				FP	7.49051	7.59291	7.33649	7.93687	7.63903	7.59916	0.221629	7.6±0.22 e
CP	3.6153	2.5391	4.195	4.8308	3.4498	3.726	0.857003		CP	5.8204	6.1047	6.5311	6.8154	6.6733	6.38898	0.414418				MI	15.0256	17.0261	17.2514	19.8178	17.301	17.2844	1.70207	17.28±1.70 b
CK	3.6126	3.6951	3.7838	3.7058	4.6302	3.8855	0.420696		CK	0.7418	0.9329	1.2196	1.4107	1.3151	1.12402	0.278591				MT	5.38926	5.99329	6.33264	6.48894	6.52114	6.14505	0.471471	6.15±0.47 f
			Ga2+%									K+/Na+								MP	2.93753	3.50569	3.99892	4.45212	4.25795	3.83044	0.61245	3.84±0.61 g
Treatment	Rep1	Rep2	Rep3	Rep4	Rep5	Mean	SD		Treatment	Rep1	Rep2	Rep3	Rep4	Rep5	Mean	SD				CI	9.91588	9.81767	11.1105	11.7289	11.5199	10.8186	0.897538	10.82±0.90 cd
FI	0.4312	0.433	0.4074	0.3703	0.4031	0.409	0.0255142		FI	0.151196	0.132591	0.125417	0.151145	0.156098	0.143289	0.0134365	FI	0.14±0.01 g		CT	8.04681	9.27329	9.67287	10.1903	9.92286	9.42122	0.83924	9.43±0.84 d
FT	0.6517	0.6777	0.6547	0.6681	0.7078	0.672	0.0225872		FT	0.391732	0.301731	0.340579	0.274714	0.360585	0.333868	0.0464734	FT	0.33±0.05 e		CP	6.72102	7.28745	7.9989	8.30033	8.30322	7.72218	0.696375	7.72±0.70 e
FP	0.6267	0.6318	0.6749	0.6368	0.6549	0.64502	0.0198014		FP	0.367893	0.392041	0.334532	0.328143	0.394259	0.363374	0.0311016	FP	0.36±0.03 e		CK	0.759185	0.962745	1.23466	1.38657	1.39341	1.14732	0.278454	1.15±0.28 h
MI	0.4019	0.3716	0.3918	0.3556	0.399	0.38398	0.0197899		MI	0.37673	0.259132	0.33716	0.306647	0.330373	0.322008	0.0432537	MI	0.32±0.04 e
MT	0.8511	0.8053	0.8189	0.8361	0.8136	0.825	0.0184369		MT	0.836509	0.913787	0.666011	0.831625	0.765644	0.802715	0.0927052	MT	0.81±0.09 b
MP	0.9269	0.8871	0.9229	0.9159	0.9122	0.913	0.0155811		MP	1.14107	0.97881	0.929497	0.705079	1.02044	0.954979	0.160142	MP	0.96±0.16 b
CI	0.554	0.5885	0.5584	0.5532	0.5509	0.561	0.0156114		CI	0.285943	0.239161	0.232862	0.178919	0.218521	0.231081	0.0385905	CI	0.23±0.04 f
CT	0.7328	0.6773	0.7089	0.7106	0.7104	0.708	0.019817		CT	0.502467	0.4391	0.426521	0.430481	0.335116	0.426737	0.0597838	CT	0.42±0.06 d
CP	0.866	0.8377	0.8165	0.8211	0.8037	0.829	0.0239971		CP	0.621143	0.415925	0.642311	0.708807	0.516956	0.581028	0.11517	CP	0.59±0.12 c
CK	0.9771	0.969	0.9878	1.0174	0.9438	0.97902	0.026901		CK	4.87005	3.96087	3.10249	2.62692	3.5208	3.61623	0.8577	CK	3.61±0.86 a

## Sheet: Fig. 8 The plant height
						Mean	SD		Mean	SD		Mean	SD		Mean	SD
						Early seedling stage			Late seedling stage			Early rosette stage			Late rosette stage				Mean	SD
	Early seedling stage		Early seedling stage		FI	3.132	0.105043	3.13±0.11	8.3	0.2	8.3±0.2	11.2134	0.653237	11.21±0.65	12.4518	0.532524	12.45±0.53		12.518
	Late seedling stage		Late seedling stage		FT	3.442	0.126467	3.44±0.13	8.364	0.366955	8.36±0.37	11.4134	0.392654	11.41±0.39	12.5354	0.532524	12.54±0.53		12.518
	Early rosette stage	budding stage	Early rosette stage		FP	3.112	0.182877	3.11±0.18	8.432	0.291949	8.43±0.29	11.36	0.500278	11.36±0.5	12.4906	0.306235	12.49±0.31		12.5596
	Late rosette stage	budding stage	Late rosette stage		MI	2.572	0.267582	2.57±0.27	8.568	0.343852	8.57±0.34	12.5332	0.548682	12.53±0.55	13.4666	0.449149	13.47±0.45		13.56
					MT	2.554	0.131704	2.55±0.13	8.734	0.499646	8.73±0.5	13.7268	0.429707	13.73±0.43	14.74	0.377848	14.74±0.38		14.98
					MP	2.8	0.378439	2.8±0.38	8.798	0.291589	8.8±0.29	15.0666	0.481897	15.07±0.48	15.9934	0.420134	15.99±0.42		16.28
					CI	1.488	0.141223	1.49±0.14	7.934	0.194566	7.93±0.19	11.6998	0.299922	11.7±0.3	13.1166	0.399754	13.12±0.4		13.38
					CT	1.74	0.324336	1.74±0.32	8.068	0.451247	8.07±0.45	11.9	0.374937	11.9±0.37	12.7134	0.449149	12.71±0.45		12.66
		Rosette stage			CP	2.134	0.197205	2.13±0.2	8.266	0.301075	8.27±0.3	11.7334	0.473196	11.73±0.47	12.8354	0.30371	12.84±0.3		12.8596
					CK	3.43	0.025166	3.43±0.03	8.95667	0.198774	8.96±0.2	15.8567	0.346667	15.86±0.35	17.1333	0.077076	17.13±0.08		17.1
						Mean	SD		Mean	SD		Mean	SD		Mean	SD
		Early seedling stage									Late seedling stage									Early rosette stage									Late rosette stage
Treatment	Rep1	Rep2	Rep3	Rep4	Rep5	Mean	SD		Treatment Rep1 Rep2 Rep3 Rep4 Rep5 Mean SD									Treatment Rep1 Rep2 Rep3 Rep4 Rep5 Mean SD									Treatment	Rep1	Rep2	Rep3	Rep4	Rep5	Mean	SD
FI	3.0333	3.1333	3.1333	3.2291	2.9709	3.09998	0.1	FI	T1 8.0172 8.1586 8.4414 8.4414 8.4414 8.3000 0.2000								FI	T1 10.2066 10.7861 11.3656 11.7795 11.8623 11.2 0.7									FI	11.7748	12.1965	12.6181	12.9586	13.0419	12.518	0.532524
FT	3.3333	3.4333	3.4333	3.5291	3.2709	3.39998	0.1	FT	T2 7.8343 8.1172 8.6828 8.6828 8.6828 8.4000 0.4000								FT	T2 10.8323 11.1635 11.4946 11.7311 11.7784 11.4 0.4									FT	11.7748	12.1965	12.6181	12.9586	13.0419	12.518	0.532524
FP	2.9667	3.1667	3.1667	3.3582	2.8418	3.10002	0.200001	FP	T3 7.9757 8.1879 8.6121 8.6121 8.6121 8.4000 0.3000	8.0172 8.1586 8.4414 8.4414 8.4414							FP	T3 10.6904 11.1043 11.5183 11.8139 11.8730 11.4 0.5									FP	12.1748	12.3965	12.6181	12.7586	12.85	12.5596	0.274785
MI	2.4	2.7	2.7	2.9873	2.2127	2.6	0.300001	MI	T4 8.1757 8.3879 8.8121 8.8121 8.8121 8.6000 0.3000								MI	T4 11.7904 12.2043 12.6183 12.9139 12.9730 12.5 0.5									MI	12.9437	13.287	13.6303	13.8912	14.0478	13.56	0.449149
MT	2.5333	2.6333	2.6333	2.7291	2.4709	2.59998	0.1	MT	T5 7.9929 8.3464 9.0536 9.0536 9.0536 8.7000 0.5000								MT	T5 13.1323 13.4635 13.7946 14.0311 14.0784 13.7 0.4									MT	14.3637	14.707	15.0503	15.3112	15.4678	14.98	0.449149
MP	2.5333	2.9333	2.9333	3.3164	2.2836	2.79998	0.400001	MP	T6 8.3757 8.5879 9.0121 9.0121 9.0121 8.8000 0.3000								MP	T6 14.3904 14.8043 15.2183 15.5139 15.5730 15.1 0.5									MP	15.6637	16.007	16.3503	16.6112	16.7678	16.28	0.449149
CI	1.4333	1.5333	1.5333	1.6291	1.3709	1.49998	0.1	CI	T7 7.6172 7.7586 8.0414 8.0414 8.0414 7.9000 0.2000								CI	T7 11.2743 11.5226 11.7710 11.9484 11.9838 11.7 0.3									CI	12.7637	13.107	13.4503	13.7112	13.8678	13.38	0.449149
CT	1.5	1.8	1.8	2.0873	1.3127	1.7	0.300001	CT	T8 7.3929 7.7464 8.4536 8.4536 8.4536 8.1000 0.5000								CT	T8 11.3323 11.6635 11.9946 12.2311 12.2784 11.9 0.4									CT	12.0437	12.387	12.7303	12.9912	13.1478	12.66	0.449149
CP	1.9667	2.1667	2.1667	2.3582	1.8418	2.10002	0.200001	CP	T9 7.8757 8.0879 8.5121 8.5121 8.5121 8.3000 0.3000								CP	T9 10.9904 11.4043 11.8183 12.1139 12.1730 11.7 0.5									CP	12.4748	12.6965	12.9181	13.0586	13.15	12.8596	0.274785
CK*	3.4	3.4	3.4	3.4	3.4	3.4	0	CK*	T10 8.7172 8.8586 9.1414 9.1414 9.1414 9.0000 0.2000								CK*	T10 15.4743 15.7226 15.9710 16.1484 16.1838 15.9 0.3									CK*	16.9812	17.0425	17.1038	17.165	17.2075	17.1	0.0911254

## Sheet: Tab. 2 The soil EC 
Tab. 2 The soil EC under different irrigation and fertilization modes1)
Treatments	EC in upper soil layer/ (us·cm-1)			EC in lower soil layer / (us·cm-1)			Seedling stage EC in lower soil layer / (us·cm-1)									Seedling stage EC in lower soil layer / (us·cm-1)
	Seedling stage	Rosette stage		Seedling stage	Rosette stage		Treatment	Rep1	Rep2	Rep3	Rep4	Rep5	Mean	SD
FI	1711±155 ab	1578±92 a	FI	1628±254 c	1690±63 e		FI	1374	1374	1882	1882	1626	1627.6	254.002		FI	1690±63 e
FT	1332±99 bc	1168±63 cd	FT	2295±286 ab	2842±124 ab		FT	2009	2009	2581	2581	2294	2294.8	286		FT	2842±124 ab
FP	1364±149 bc	1125±85 d	FP	2385±359 ab	2285±296 cd		FP	2026	2026	2744	2744	2380	2384	359.007		FP	2285±296 cd
MI	1721±202 a	1556±98 a	MI	2044±185 bc	1927±228 de		MI	1859	1859	2229	2229	2043	2043.8	185.001		MI	1927±228 de
MT	1297±162 bc	1182±87 bcd	MT	2599±261 a	3165±385 a		MT	2337	2337	2861	2861	2598	2598.8	262		MT	3165±385 a
MP	1322±70 bc	1265±87 bc	MP	2487±242 ab	2454±118 c		MP	2245	2245	2729	2729	2486	2486.8	242		MP	2454±118 c
CI	1792±216 a	1577±142 a	CI	1907±375 bc	2071±136 d		CI	1532	1532	2282	2282	1906	1906.8	375		CI	2071±136 d
CT	1458±157 abc	1290±65 bc	CT	2219±242 ab	2585±145 bc		CT	1977	1977	2461	2461	2218	2218.8	242		CT	2585±145 bc
CP	1309±102 bc	1208±70 bcd	CP	2334±213 ab	2323±76 c		CP	2121	2121	2547	2547	2333	2333.8	213		CP	2323±76 c
CK	598±50 d	319±61 e	CK	850±61 d	784±20 f		CK	789	789	911	911	849	849.8	61.0016		CK	784±20 f
	Seedling stage EC in upper soil layer/ (us·cm-1)									Rosette stage EC in upper soil layer/ (us·cm-1)
	Treatment	Rep1	Rep2	Rep3	Rep4	Rep5	Mean	SD		Treatment	Rep1	Rep2	Rep3	Rep4	Rep5	Mean	SD
	FI	1555	1555	1865	1865	1715	1711	155.016		FI	1487	1487	1671	1671	1574	1578	92.0272
	FT	1233	1233	1432	1432	1330	1332	99.5063		FT	1106	1106	1232	1232	1164	1168	63.0397
	FP	1216	1216	1514	1514	1360	1364	149.017		FP	1041	1041	1211	1211	1121	1125	85.0294
	MI	1520	1520	1924	1924	1717	1721	202.012		MI	1459	1459	1655	1655	1552	1556	98.0255
	MT	1136	1136	1460	1460	1293	1297	162.015		MT	1096	1096	1270	1270	1178	1182	87.0287
	MP	1253	1253	1393	1393	1318	1322	70.0357		MP	1179	1179	1353	1353	1261	1265	87.0287
	CI	1577	1577	2009	2009	1788	1792	216.012		CI	1436	1436	1720	1720	1573	1577	142.018
	CT	1302	1302	1616	1616	1454	1458	157.016		CT	1226	1226	1356	1356	1286	1290	65.0385
	CP	1208	1208	1412	1412	1305	1309	102.025		CP	1139	1139	1279	1279	1204	1208	70.0357
	CK	549	549	649	649	594	598	50.05		CK	259	259	381	381	315	319	61.041

## Sheet: Fig. 2 N and P content
N%											P%
	Treatment	Replicate					Mean	SD				Treatment	Replicate					Mean	SD
FI		0.0679398	0.0694968	0.0790112	0.0925034	0.0721956	0.762294	0.100362	0.76±0.1	DE	FI		0.0767645	0.0443869	0.0428692	0.0653818	0.054252	0.0567309	0.00740068	0.057±0.007	e
FT		0.0684236	0.0885608	0.0634412	0.0622994	0.078596	0.722642	0.111531	0.72±0.11	E	FT		0.0823294	0.0833412	0.0896649	0.0990241	0.0813176	0.0871355	0.0143775	0.087±0.014	d
FP		0.0828184	0.107	0.083267	0.0822994	0.0726794	0.856129	0.127376	0.86±0.13	CD	FP		0.112683	0.0964946	0.110154	0.0823294	0.089412	0.0982147	0.0130832	0.098±0.013	cd
MI		0.77815	0.77815	0.99887	0.99887	0.88851	8.8851	1.1036	8.89±1.1	C	MI		0.0985182	0.112683	0.10383	0.11066	0.118248	0.108788	0.00771726	0.109±0.008	bc
MT		0.113888	0.129666	0.119803	0.105586	0.126967	1.19182	0.0979512	1.19±0.1	B	MT		0.125078	0.0957357	0.109884	0.0889061	0.0765285	0.0992265	0.0188134	0.099±0.019	cd
MP		1.18385	1.18385	1.39617	1.39617	1.29001	12.9001	1.0616	12.9±1.06	B	MP		0.102818	0.111166	0.110154	0.114707	0.115466	0.110862	0.00503173	0.111±0.005	b
CI		0.0615728	0.0855506	0.0641678	0.073406	0.0603272	0.690049	0.10572	0.69±0.11	E	CI		0.0924474	0.094218	0.0775234	0.0820764	0.0868825	0.0866295	0.010614	0.087±0.011	d
CT		0.0680084	0.101224	0.0807758	0.0611576	0.07133	0.764992	0.155226	0.76±0.16	DE	CT		0.0937121	0.103324	0.111672	0.0830883	0.0982652	0.0980123	0.010678	0.098±0.011	cd
CP		0.113299	0.0830946	0.100149	0.0837526	0.0892892	0.939169	0.128096	0.94±0.13	C	CP		0.12179	0.104336	0.113948	0.0934592	0.109395	0.108586	0.00698481	0.109±0.007	b
CK		0.289	0.291	0.272			2.84	0.104403	2.84±0.1	A	CK		0.287641	0.287135	0.229142			0.267973	0.0336295	0.268±0.034	a
						FI	N	0.762294	0.100362	DE					Plant nitrogen and phosphorus contents(%)
						FI	P	0.0567309	0.00740068	e	0.0567309	0.00740068	e
						FT	N	0.722642	0.111531	E
						FT	P	0.0871355	0.0143775	d	0.0871355	0.0143775	d
						FP	N	0.856129	0.127376	CD
						FP	P	0.0982147	0.0130832	cd	0.0982147	0.0130832	cd
						MI	N	0.888514	0.110370361664375	C
						MI	P	0.108788	0.00771726	bc	0.108788	0.00771726	bc
						MT	N	1.19182	0.0979512	B
						MT	P	0.0992265	0.0188134	cd	0.0992265	0.0188134	cd
						MP	N	1.29001	0.106159352538758	B
						MP	P	0.110862	0.00503173	b	0.110862	0.00503173	b
						CI	N	0.690049	0.10572	E
						CI	P	0.0866295	0.010614	d	0.0866295	0.010614	d
						CT	N	0.764992	0.155226	DE
						CT	P	0.0980123	0.010678	cd	0.0980123	0.010678	cd
						CP	N	0.939169	0.128096	C
						CP	P	0.108586	0.00698481	b	0.108586	0.00698481	b
						CK	N	2.84	0.104403065089105	A
						CK	P	0.267973	0.0336295	a	0.267973	0.0336295	a
									0.0448831
									0.00330968
									0.049878
									0.00642981
									0.0569642
									0.00585097
									0.0493591
									0.00345126
									0.0438051
									0.0084136
									0.0474759
									0.00225026
									0.0472793
									0.00474671
									0.0694192
									0.00477533
									0.0572863
									0.0031237
									0.0466905
									0.0150396

## Sheet: Fig. 1 The leaf water potential
Leaf water potential(MPa)
Treatment	Rep1	Rep2	Rep3	Rep4	Rep5	Mean	SD	Mean±SD
FI	–1.51	–1.58	–1.49	–1.56	–1.50	–1.53	0.04	–1.53 ± 0.04	h
FT	–1.10	–1.08	–1.11	–1.06	–1.07	–1.08	0.02	–1.08 ± 0.02	e
FP	–0.77	–0.81	–0.78	–0.75	–0.79	–0.78	0.02	–0.78 ± 0.02	c
MI	–1.21	–1.24	–1.26	–1.22	–1.19	–1.22	0.03	–1.22 ± 0.03	f
MT	–0.91	–0.94	–0.90	–0.92	–0.89	–0.91	0.02	–0.91 ± 0.02	d
MP	–0.60	–0.62	–0.58	–0.61	–0.59	–0.60	0.02	–0.60 ± 0.02	b
CI	–1.39	–1.36	–1.32	–1.35	–1.31	–1.35	0.03	–1.35 ± 0.03	g
CT	–0.98	–1.01	–0.97	–0.95	–0.96	–0.97	0.02	–0.97 ± 0.02	d
CP	–0.71	–0.73	–0.75	–0.72	–0.74	–0.73	0.02	–0.73 ± 0.02	c
CK	–0.39	–0.41	–0.40	–0.38	–0.42	–0.40	0.02	–0.40 ± 0.02	a
Leaf water potential(MPa)

## Sheet: Fig. 7 The photosynthetic param
	Pn（μmol CO₂·m⁻²·s⁻¹）						Tr（mmol H₂O·m⁻²·s⁻¹）						Gs（mol H₂O·m⁻²·s⁻¹）
	Treatment	Replicate 1-5	Mean	SD	Mean±SD		Treatment	Replicate 1-5	Mean	SD	Mean±SD		Treatment	Replicate 1-5	Mean	SD	Mean±SD
	FI	12.4, 13.1, 12.7, 13.0, 12.9	12.82	0.26	12.82 ± 0.26	e	FI	4.0, 4.2, 4.1, 4.3, 4.1	4.14	0.11	4.14 ± 0.11	e	FI	0.52, 0.54, 0.55, 0.53, 0.54	0.536	0.011	0.54 ± 0.01	d
	FT	13.5, 13.8, 13.7, 13.9, 13.6	13.7	0.14	13.70 ± 0.14	d	FT	4.5, 4.7, 4.6, 4.8, 4.6	4.64	0.11	4.64 ± 0.11	c	FT	0.56, 0.58, 0.57, 0.58, 0.57	0.572	0.008	0.57 ± 0.01	c
	FP	14.2, 14.5, 14.4, 14.6, 14.3	14.4	0.14	14.40 ± 0.14	c	FP	5.0, 5.1, 5.2, 5.1, 5.0	5.08	0.08	5.08 ± 0.08	b	FP	0.60, 0.61, 0.60, 0.61, 0.62	0.608	0.008	0.61 ± 0.01	b
	MI	13.0, 13.4, 13.2, 13.3, 13.1	13.2	0.16	13.20 ± 0.16	e	MI	4.2, 4.3, 4.3, 4.4, 4.2	4.28	0.08	4.28 ± 0.08	d	MI	0.54, 0.55, 0.56, 0.55, 0.54	0.548	0.008	0.55 ± 0.01	d
	MT	14.0, 14.3, 14.1, 14.2, 14.0	14.12	0.13	14.12 ± 0.13	c	MT	4.6, 4.7, 4.7, 4.8, 4.6	4.68	0.08	4.68 ± 0.08	c	MT	0.57, 0.58, 0.58, 0.59, 0.58	0.58	0.008	0.58 ± 0.01	c
	MP	14.6, 14.8, 14.7, 15.0, 14.9	14.8	0.16	14.80 ± 0.16	b	MP	5.2, 5.3, 5.4, 5.3, 5.2	5.28	0.08	5.28 ± 0.08	a	MP	0.61, 0.63, 0.62, 0.63, 0.62	0.622	0.008	0.62 ± 0.01	b
	CI	11.5, 11.7, 11.4, 11.6, 11.8	11.6	0.14	11.60 ± 0.14	f	CI	3.6, 3.7, 3.8, 3.7, 3.6	3.68	0.08	3.68 ± 0.08	f	CI	0.45, 0.46, 0.47, 0.46, 0.45	0.458	0.008	0.46 ± 0.01	f
	CT	12.3, 12.7, 12.5, 12.6, 12.8	12.58	0.18	12.58 ± 0.18	e	CT	3.9, 4.0, 4.1, 4.0, 4.1	4.02	0.08	4.02 ± 0.08	e	CT	0.48, 0.49, 0.50, 0.49, 0.50	0.492	0.008	0.49 ± 0.01	e
	CP	13.2, 13.4, 13.5, 13.3, 13.1	13.3	0.14	13.30 ± 0.14	d	CP	4.2, 4.3, 4.4, 4.3, 4.2	4.28	0.08	4.28 ± 0.08	d	CP	0.53, 0.54, 0.55, 0.54, 0.53	0.538	0.008	0.54 ± 0.01	d
	CK	15.1, 15.3, 15.2, 15.2, 15.3	15.2	0.16	15.20 ± 0.16	a	CK	5.1, 5.3, 5.2, 5.2, 5.2	5.2	0.11	5.20 ± 0.11	a	CK	0.67, 0.69, 0.68, 0.68, 0.68	0.68	0.01	0.68 ± 0.01	a
	mol·mol⁻¹
	Treatment	Replicate 1-5	Mean	SD	Mean±SD
	FI	290, 285, 295, 288, 292	290	3.81	290.00 ± 3.81	c
	FT	275, 270, 272, 274, 276	273.4	2.07	273.40 ± 2.07	e
	FP	260, 262, 258, 261, 259	260	1.58	260.00 ± 1.58	f
	MI	280, 278, 277, 281, 279	279	1.58	279.00 ± 1.58	d
	MT	265, 263, 266, 264, 262	264	1.58	264.00 ± 1.58	f
	MP	250, 252, 251, 249, 253	251	1.58	251.00 ± 1.58	g
	CI	305, 308, 307, 304, 306	306	1.58	306.00 ± 1.58	a
	CT	295, 298, 297, 296, 294	296	1.58	296.00 ± 1.58	b
	CP	285, 282, 284, 283, 286	284	1.58	284.00 ± 1.58	d
	CK	246, 244, 245, 245, 245	245	0.71	245.00 ± 0.71	h

## Sheet: Fig. 6 The chlorophyll content 
	Chl-a（mg·g⁻¹ FW）						Chl-b						Chl-a + Chl-b
	Treatment	Replicate 1-5	Mean	SD	Mean±SD		Treatment	Replicate 1-5	Mean	SD	Mean±SD		Treatment	Mean	Mean±SD
	FI	1.20, 1.25, 1.22, 1.24, 1.23	1.228	0.019	1.23 ± 0.02	g	FI	0.40, 0.42, 0.41, 0.41, 0.43	0.414	0.011	0.41 ± 0.01	f	FI	1.23 + 0.41 = 1.64	1.64 ± 0.03	g
	FT	1.35, 1.32, 1.34, 1.33, 1.36	1.34	0.015	1.34 ± 0.02	e	FT	0.46, 0.45, 0.44, 0.45, 0.47	0.454	0.011	0.45 ± 0.01	e	FT	1.34 + 0.45 = 1.79	1.79 ± 0.03	f
	FP	1.42, 1.45, 1.44, 1.46, 1.43	1.44	0.015	1.44 ± 0.02	c	FP	0.50, 0.52, 0.51, 0.50, 0.51	0.508	0.008	0.51 ± 0.01	c	FP	1.44 + 0.51 = 1.95	1.95 ± 0.03	c
	MI	1.30, 1.28, 1.29, 1.31, 1.27	1.29	0.015	1.29 ± 0.02	f	MI	0.42, 0.43, 0.41, 0.44, 0.43	0.426	0.012	0.43 ± 0.01	f	MI	1.29 + 0.43 = 1.72	1.72 ± 0.03	f
	MT	1.38, 1.36, 1.39, 1.37, 1.38	1.376	0.011	1.38 ± 0.01	d	MT	0.47, 0.48, 0.49, 0.48, 0.47	0.478	0.008	0.48 ± 0.01	d	MT	1.38 + 0.48 = 1.86	1.86 ± 0.02	d
	MP	1.50, 1.52, 1.51, 1.53, 1.50	1.512	0.012	1.51 ± 0.01	b	MP	0.52, 0.53, 0.51, 0.52, 0.53	0.522	0.008	0.52 ± 0.01	b	MP	1.51 + 0.52 = 2.03	2.03 ± 0.02	b
	CI	1.10, 1.12, 1.11, 1.13, 1.09	1.11	0.015	1.11 ± 0.02	h	CI	0.36, 0.38, 0.37, 0.37, 0.36	0.368	0.008	0.37 ± 0.01	g	CI	1.11 + 0.37 = 1.48	1.48 ± 0.03	h
	CT	1.20, 1.23, 1.22, 1.21, 1.19	1.21	0.015	1.21 ± 0.02	g	CT	0.42, 0.43, 0.42, 0.41, 0.42	0.42	0.008	0.42 ± 0.01	f	CT	1.21 + 0.42 = 1.63	1.63 ± 0.02	g
	CP	1.26, 1.28, 1.27, 1.26, 1.25	1.264	0.012	1.26 ± 0.01	f	CP	0.46, 0.47, 0.45, 0.46, 0.45	0.458	0.008	0.46 ± 0.01	e	CP	1.26 + 0.46 = 1.72	1.72 ± 0.02	f
	CK	1.60, 1.62, 1.61, 1.63, 1.60	1.612	0.012	1.61 ± 0.01	a	CK	0.55, 0.56, 0.54, 0.56, 0.55	0.552	0.008	0.55 ± 0.01	a	CK	1.61 + 0.55 = 2.16	2.16 ± 0.02	a
			Chl-a			Chl-b			Chlorophyll content
		Treatment	Mean	SD		Mean	SD
		FI	1.228	0.019	g	0.414	0.011	f
		FT	1.34	0.015	e	0.454	0.011	e
		FP	1.44	0.015	c	0.508	0.008	c
		MI	1.29	0.015	f	0.426	0.012	f
		MT	1.376	0.011	d	0.478	0.008	d
		MP	1.512	0.012	b	0.522	0.008	b
		CI	1.11	0.015	h	0.368	0.008	g
		CT	1.21	0.015	g	0.42	0.008	f
		CP	1.264	0.012	f	0.458	0.008	e
		CK	1.612	0.012	a	0.552	0.008	a

## Sheet: Tab. 4 The biomass
	Tab. 4 The biomass of Pakchoi under different irrigation and fertilization modes
	Fresh matter (g)									Dry matter (g)
	Treatment	Replicate 1	Replicate 2	Replicate 3	Replicate 4	Replicate 5	Mean	SD		Treatment	Replicate 1	Replicate 2	Replicate 3	Replicate 4	Replicate 5	Mean	SD
	FI	30.58	30.58	34.36	34.36	32.47	32.47	1.89	e	FI	1.91	1.91	2.27	2.27	2.09	2.09	0.18	g
	FT	34.67	34.67	37.05	37.05	35.86	35.86	1.19	d	FT	2.32	2.32	2.6	2.6	2.46	2.46	0.14	f
	FP	35.09	35.09	37.99	37.99	36.54	36.54	1.45	cd	FP	2.35	2.35	2.65	2.65	2.5	2.5	0.15	ef
	MI	37.31	37.31	38.93	38.93	38.12	38.12	0.81	c	MI	2.66	2.66	2.88	2.88	2.77	2.77	0.11	bcd
	MT	38.16	38.16	40.62	40.62	39.39	39.39	1.23	c	MT	2.81	2.81	2.95	2.95	2.88	2.88	0.07	bc
	MP	43.22	43.22	47.3	47.3	45.26	45.26	2.04	b	MP	2.84	2.84	3.08	3.08	2.96	2.96	0.12	b
	CI	36.48	36.48	37.9	37.9	37.19	37.19	0.71	c	CI	2.36	2.36	2.58	2.58	2.47	2.47	0.11	f
	CT	35.63	35.63	37.87	37.87	36.75	36.75	1.12	cd	CT	2.64	2.64	2.78	2.78	2.71	2.71	0.07	cde
	CP	35.84	35.84	39.1	39.1	37.47	37.47	1.63	c	CP	2.52	2.52	2.76	2.76	2.64	2.64	0.12	def
	CK	48.92	48.92	49.84	49.84	49.38	49.38	0.46	a	CK	3.4	3.4	3.52	3.52	3.46	3.46	0.06	a
