# Supplementary material for: Mechanistic study on integrated water-fertilizer management to alleviate Na + toxicity and enhance salt tolerance and yield of pakchoi under salt stress
Source: PeerJ journal article supplement (doi:10.7717/peerj.20431), 2025-12-18
Supplement: Raw_Data_revised.zip [file Raw Data-2-revised.xlsx]

## Sheet: Organic - Proline (μgg F
Treatment	Rep1	Rep2	Rep3	Rep4	Rep5	Mean	SD	Mean ± SD
FI	343	368.79	354.4	273.06	329.16	333.682	36.8921	333.68±36.89		a
FT	277.12	284.21	242.52	259.61	287.71	270.234	18.9017	270.23±18.9		b
FP	167.42	176.44	186.14	162.17	178.23	174.08	9.41328	174.08±9.41		c
MI	268.49	246.93	261.41	273.49	209.44	251.952	25.7844	251.95±25.78		b
MT	172.37	195.31	197.37	174.75	189.01	185.762	11.5874	185.76±11.59		c
MP	135.19	156.84	151.01	146.17	125.43	142.928	12.6039	142.93±12.6		d
CI	304.83	259.3	273.55	293.81	295.34	285.366	18.4979	285.37±18.5		ab
CT	217.59	210	186.35	182.92	198.28	199.028	14.8803	199.03±14.88		c
CP	152.39	155.72	181.12	180.42	147.4	163.41	16.1236	163.41±16.12		cd
CK	72.01	63.78	88.3	87.96	70.1	76.43	11.107	76.43±11.11		e
	Proline content, μg/g FW

## Sheet: Organic - Soluble protein
Treatment	Rep1	Rep2	Rep3	Rep4	Rep5	Mean	SD	Mean ± SD
FI	27.93	29.79	29.02	27.9	29.26	28.78	0.837407	28.78±0.84		FI		a
FT	27.12	27.51	27.44	26.33	28.16	27.312	0.666311	27.31±0.67		FT		ab
FP	16.07	16.65	17.78	15.77	15.47	16.348	0.911603	16.35±0.91		FP		e
MI	26.94	22.83	26.23	25.51	25.12	25.326	1.55953	25.33±1.56		MI		bc
MT	21.21	21.64	22.08	22.77	22.15	21.97	0.585449	21.97±0.59		MT		d
MP	14.03	13.64	13.68	12	14.29	13.528	0.894858	13.53±0.89		MP		f
CI	30.41	29	29.07	28.8	27.29	28.914	1.10907	28.91±1.11		CI		a
CT	24.51	25.73	25	23.85	25	24.818	0.694601	24.82±0.69		CT		c
CP	15.69	15.73	17.03	15.6	15.86	15.982	0.593271	15.98±0.59		CP		e
CK	10.4	8.71	9.72	9.79	9.33	9.59	0.623498	9.59±0.62		CK		g
1.2 Soluble protein content, mg/g FW

## Sheet: Organic - Soluble sugar (
Treatment	Rep1	Rep2	Rep3	Rep4	Rep5	Mean	SD	Mean ± SD
FI	50.08	47.1	47.69	49.14	46.52	48.106	1.47193	48.11±1.47		a
FT	41.13	44.91	45.07	46.17	41.91	43.838	2.18836	43.84±2.19		b
FP	38.73	40.4	39.24	40.82	39.38	39.714	0.865783	39.71±0.87		c
MI	38.1	42.48	42.75	39.88	42.43	41.128	2.05428	41.13±2.05		bc
MT	39.2	38.12	37.83	37.98	39.57	38.54	0.789082	38.54±0.79		c
MP	25.67	22.85	30.07	26.18	21.51	25.256	3.31742	25.26±3.32		d
CI	47.53	46.79	50.04	46.16	52.91	48.686	2.78331	48.69±2.78		a
CT	42.34	43.07	40.16	42.79	41.98	42.068	1.14537	42.07±1.15		b
CP	23.25	27.04	25.31	27.6	27.01	26.042	1.78126	26.04±1.78		d
CK	24.355	23.31	22.4	23.85	25.62	23.907	1.2006	23.91±1.2		d
	Soluble sugar content, mg/g FW

## Sheet: Organic - Glucose (μmolg
Treatment	Rep1	Rep2	Rep3	Rep4	Rep5	Mean	SD	Mean ± SD
FI	20.33	25.85	25.77	19.74	20.83	22.504	3.04264	22.5±3.04		ab
FT	23.49	32.23	23.64	25.12	24.64	25.824	3.64526	25.82±3.65		a
FP	18.41	13.61	15.99	19.26	17.11	16.876	2.21038	16.88±2.21		cd
MI	20.01	20.51	21.86	21.62	20.62	20.924	0.784175	20.92±0.78		b
MT	17.84	18.19	15.23	16.96	17.45	17.134	1.15855	17.13±1.16		cd
MP	15	12.96	10.46	13.73	15.53	13.536	1.99691	13.54±2		de
CI	24.44	22.05	22.95	22.53	23.49	23.092	0.921586	23.09±0.92		ab
CT	13.51	18.53	16.61	20.05	16.31	17.002	2.47243	17±2.47		cd
CP	12.91	13.35	10.68	12.86	12.66	12.492	1.04378	12.49±1.04		e
CK	10.04	11.86	12.92	6.86	9.4	10.216	2.34382	10.22±2.34		e
Glucose content, μmol/g FW
							ab	a	cd	b	cd	de	ab	cd	e	e

## Sheet: Organic - Fructose (mgg 
Treatment	Rep1	Rep2	Rep3	Rep4	Rep5	Mean	SD	Mean ± SD
FI	15.01	13.73	14.32	13.91	13.78	14.15	0.533713	14.15±0.53		a
FT	7.8	9.13	9.59	8.99	10.72	9.246	1.05604	9.25±1.06		cd
FP	7.56	8.1	9.98	9.59	9.57	8.96	1.06172	8.96±1.06		d
MI	10.56	12.14	10.56	11.99	11.36	11.322	0.754665	11.32±0.75		bc
MT	8.33	8.24	7.81	7.9	8.69	8.194	0.353737	8.19±0.35		d
MP	6.86	6.06	6.98	6.6	6.48	6.596	0.359833	6.6±0.36		e
CI	11.72	11.19	11.64	11.34	11.66	11.51	0.231733	11.51±0.23		b
CT	9.63	9.31	8.65	8.71	9.55	9.17	0.463033	9.17±0.46		d
CP	7.2	7.26	6.55	7.16	6.94	7.022	0.290207	7.02±0.29		e
CK	4.79	4.54333	5.58333	4.47667	4.40333	4.75933	0.483014	4.76±0.48		f
Fructose content, mg/g FW
					a	cd	d	bc	d	e		b	d		e	f

## Sheet: Organic - Sucrose (mgg F
Treatment	Rep1	Rep2	Rep3	Rep4	Rep5	Mean	SD	Mean ± SD
FI	15.05	16.37	17.34	18.35	20.58	17.538	2.09205	17.54±2.09		a
FT	16.32	18.87	14.37	16.89	15.83	16.456	1.64146	16.46±1.64		a
FP	12.06	11.79	12.71	14.06	12.27	12.578	0.894131	12.58±0.89		b
MI	17.09	17.09	16.05	14.61	16.19	16.206	1.0167	16.21±1.02		a
MT	13.05	11.23	13.06	12.55	13.69	12.716	0.923894	12.72±0.92		b
MP	10.56	7.81	7.78	8	6.6	8.15	1.4565	8.15±1.46		c
CI	15.81	16.8	17.5	17.9	16.4	16.882	0.837628	16.88±0.84		a
CT	15.58	15.09	15.11	15.57	14.48	15.166	0.451143	15.17±0.45		a
CP	11.11	10.7	10.87	9.18	10.73	10.518	0.765291	10.52±0.77		c
CK	4.89	5.07	5.38667	5.19667	4.88	5.08467	0.214328	5.08±0.21		d
Sucrose content, mg/g FW

## Sheet: ROS - O2- (μmolg FW)
Treatment	Rep1	Rep2	Rep3	Rep4	Rep5	Mean	SD	Mean ± SD
FI	2.02	1.92	2.28	1.82	1.79	1.966	0.197434	1.97±0.2		a
FT	1.36	1.77	1.68	1.47	1.31	1.518	0.200175	1.52±0.2		bc
FP	1.03	0.7	0.94	0.69	1.14	0.9	0.200125	0.9±0.2		de
MI	1.9	2.09	1.68	1.79	2.01	1.894	0.164712	1.89±0.16		ab
MT	0.87	1.16	0.8	1.09	1.3	1.044	0.206712	1.04±0.21		d
MP	0.81	0.52	0.58	0.5	0.67	0.616	0.127004	0.62±0.13		ef
CI	2.13	1.93	2.06	1.64	1.93	1.938	0.187537	1.94±0.19		a
CT	1.46	1.29	0.91	1.23	1.26	1.23	0.199875	1.23±0.2		cd
CP	0.61	0.76	0.93	0.6	0.86	0.752	0.147207	0.75±0.15		e
CK	0.58	0.59	0.46	0.35	0.29	0.454	0.134276	0.45±0.13		f
O₂⁻ content, μmol·g⁻¹ FW

## Sheet: ROS - H2O2 (μmolg FW
Treatment	Rep1	Rep2	Rep3	Rep4	Rep5	Mean	SD	Mean ± SD
FI	3	3.15	3.77	3.65	2.97	3.308	0.375659	3.31±0.38		a
FT	2.1	2.09	2.82	2.37	2.43	2.362	0.298781	2.36±0.3		bc
FP	1.48	1.23	1.55	1.46	1.4	1.424	0.120955	1.42±0.12		d
MI	2.8	2.78	2.9	2.05	2.38	2.582	0.357659	2.58±0.36		b
MT	0.79	2.09	1.71	1.3	2	1.578	0.537559	1.58±0.54		cd
MP	1.77	1.41	0.85	1.15	0.9	1.216	0.38168	1.22±0.38		de
CI	2.73	2.4	2.29	3.45	2.63	2.7	0.454533	2.7±0.45		ab
CT	1.77	1.97	2.35	2.21	2.17	2.094	0.226451	2.09±0.23		bc
CP	1.37	1.31	1.46	1.26	1.36	1.352	0.0746324	1.35±0.07		d
CK	0.74	1.04	1.02	0.8	0.66	0.852	0.170059	0.85±0.17		e
H₂O₂ content, μmol·g⁻¹ FW

## Sheet: ROS - Electrolyte lea
Treatment	Rep1	Rep2	Rep3	Rep4	Rep5	Mean	SD	Mean ± SD
FI	27.1	35.22	30.8	35.32	30.43	31.774	3.5018	31.77±3.5		a	1
FT	18.65	21.62	26.43	22.52	20.93	22.03	2.84616	22.03±2.85		b	4
FP	20.5	15.83	19.13	17.97	24.31	19.548	3.16509	19.55±3.17		b	7
MI	24	26.15	26.39	23.85	22.44	24.566	1.67249	24.57±1.67		b	3
MT	20.46	22.4	14.23	23.75	20.83	20.334	3.65575	20.33±3.66		b	6
MP	11.62	14.02	13.9	12.54	14.32	13.28	1.15291	13.28±1.15		d	9
CI	29.74	25.47	30.92	25.17	19.35	26.13	4.56349	26.13±4.56		ab	2
CT	17.76	23.4	20.22	24.43	18.15	20.792	3.0223	20.79±3.02		b	5
CP	14.04	14.51	15.19	13.38	13.15	14.054	0.832184	14.05±0.83		cd	8
CK	10.61	11.35	11.59	10.22	10.64	10.882	0.568129	10.88±0.57		e	10
Electrolyte leakage, %

## Sheet: ROS - MDA (nmolg FW)
Treatment	Rep1	Rep2	Rep3	Rep4	Rep5	Mean	SD	Mean ± SD
FI	3.24	3.73	3.83	4.42	2.84	3.612	0.601806	3.61±0.6		a
FT	2.12	2.35	1.89	2.61	1.31	2.056	0.495358	2.06±0.5		bc
FP	2.51	1.52	1.51	1.77	1.67	1.796	0.413618	1.8±0.41		c
MI	2.4	2.41	2.76	3.18	2.92	2.734	0.335678	2.73±0.34		ab
MT	1.79	1.51	1.99	1.92	2.27	1.896	0.278173	1.9±0.28		c
MP	1.05	1.18	0.8	1.09	1.53	1.13	0.264292	1.13±0.26		de
CI	3.18	3.61	3.47	3.53	2.99	3.356	0.261113	3.36±0.26		a
CT	1.93	2.61	1.95	1.53	1.96	1.996	0.387918	2±0.39		bc
CP	1.04	1.54	1.38	1.71	1.51	1.436	0.250659	1.44±0.25		cd
CK	0.96	0.83	0.61	0.63	1.08	0.822	0.204622	0.82±0.2		e
Malondialdehyde content, nmol·g⁻¹ FW

[truncated: 4 more sheets: Enzyme - SOD (Ug FW), Enzyme - POD (Ug FW), Enzyme - CAT (Ug FW), Enzyme - APX (Ug FW)]
